# Supplementary material for: Molecular-Level Variation Affects Population Growth in a Butterfly Metapopulation
Source: PLOS journal article supplement (doi:10.1371/journal.pbio.0040129), 2006-04-18
Supplement: S1 (10.1371/journal.pbio.0040129.s001) [file journal.pbio.0040129.s001]

**Supporting information**

# *Population growth explained by allelic variation in 4 other allozymes and 2 microsatellites.* We checked whether the patterns in Figs. 1, 2 and 4 in the main text could be detected in the 4 other autosomal allozymes (*PepA, PepD, Ak,* and *Got*)and in the 2 microsatellites (*CINX22* and *CINX38*) that were scored for this material*.* As explanatory variables, we used the frequencies of the two most common alleles at each locus, and for comparison we repeated the analysis for *Pgi* using the frequencies of *f* and *d* instead of *F* and *D*. Allelic variation in the 4 allozymes excluding *Pgi* and in the 2 microsatellites explained no variation in *R* (Table S1)*.*

# *Allele frequency differentiation in 4 other allozymes and 2 microsatellites.* Table S2 summarizes the results for models explaining the frequency of particular alleles by the logarithm of patch area (ln *A*), landscape connectivity (*Slandscape*), and their interaction (similar to Fig. 4 in the main text). Only the model involving *Pgi-f* yields a clearly significant result, comparable to that in Fig. 4 for *F*.

***Inbreeding.*** We used the frequency of heterozygous loci (*HL*) calculated over the 4 allozymes (excluding *Pgi*) and 2 microsatellites as a surrogate measure of inbreeding. One could expect *HL* to have an effect on population growth especially in isolated populations (*S95*<15), in which local dynamics are relatively little affected by migration. The effect of *HL* was non-significant when added to the model in Table 1 (isolated populations), but it became marginally significant when the multiple regression was weighted by sample size (*N95*; Table S3). We conclude that the results on *Pgi* are not due to any effects of inbreeding.

**Table S1.** Multiple regression models of population growth explained by ecological factors and 5 allozymes and 2 microsatellites.

This table reports results similar to those in Table 1 in the main text for the two most common alleles in the 5 allozymes and 2 microsatellites. Multiple regression models for population growth rate (*R*) explained by the logarithm of population size (ln *N95*), regional trend in population sizes (*Ntrend*), frequency of the particular allele (frequency in the metapopulation as a whole given in brackets), the logarithm of patch area (ln *A*), and the interaction between allele frequency and ln *A.* Results are given for all populations and separately for isolated (*S95*<15) populations.

*Pgi-f* (0.21)

All populations Isolated

populations

Coeff t P Coeff t P

Constant -1.15 -2.41 0.017 -2.47 -4.31 <0.001

ln *N95* -0.22 -2.48 0.015 -0.19 -1.64 0.110

*Ntrend* 0.40 8.03 <0.001 0.34 6.07 <0.001

*Pgi-f*  3.31 1.97 0.051 7.52 4.16 <0.001

ln *A* 0.11 1.83 0.069 0.26 3.66 0.001

*Pgi-f**ln *A* -0.36 -1.63 0.105 -0.88 -3.65 0.001

Adjusted *R2* 0.40 0.64

*F* 18.05 16.53

*n* 131 44

*Pgi-d* (0.51)

All populations Isolated

populations

Coeff t P Coeff t P

Constant -0.32 -0.39 0.694 1.88 1.67 0.102

ln *N95* -0.21 -2.31 0.023 -0.20 -1.38 0.175

*Ntrend* 0.42 8.26 <0.001 0.34 5.49 <0.001

*Pgi-d* -0.23 -0.18 0.861 -4.89 -2.75 0.009

ln *A* 0.03 0.26 0.793 -0.28 -1.88 0.067

*Pgi-d**ln *A* 0.01 0.08 0.938 0.64 2.50 0.017

Adjusted *R2* 0.37 0.54

*F* 16.20 11.07

*n* 131 44

*PepA-2* (0.28)

All populations Isolated

populations

Coeff t P Coeff t P

Constant -0.35 -0.66 0.513 -0.19 -0.26 0.797

ln *N95* -0.19 -2.04 0.043 -0.04 -0.31 0.757

*Ntrend* 0.42 7.93 <0.001 0.40 5.83 <0.001

*PepA-2* -0.27 -0.17 0.862 -2.98 -1.43 0.162

ln *A* 0.02 0.31 0.760 -0.04 -0.41 0.682

*PepA-2 ** ln *A* 0.02 0.10 0.922 0.33 1.14 0.262

Adjusted *R2* 0.34 0.47

*F* 13.99 8.63

*n* 126 44

*PepA-7* (0.24)

All populations Isolated

populations

Coeff t P Coeff t P

Constant -0.14 -0.25 0.800 -0.80 -0.69 0.497

ln *N95* -0.19 -2.07 0.040 -0.10 -0.69 0.495

*Ntrend* 0.42 8.06 <0.001 0.40 5.54 <0.001

*PepA-7* -1.16 -0.75 0.455 -0.42 -0.17 0.869

ln *A* -0.02 -0.24 0.814 0.03 0.19 0.850

*PepA-7 ** ln *A* 0.18 0.80 0.424 0.12 0.34 0.739

Adjusted *R2* 0.37 0.43

*F* 16.20 7.58

*n* 131 44

*PepD-3* (0.91)

All populations Isolated

populations

Coeff t P Coeff t P

Constant -1.57 -0.43 0.667 2.64 0.34 0.736

ln *N95* -0.20 -2.24 0.027 -0.14 -0.94 0.354

*Ntrend* 0.43 8.25 <0.001 0.39 5.20 <0.001

*PepD-3* 1.22 0.32 0.751 -3.60 -0.45 0.655

ln *A* 0.13 0.27 0.784 -0.37 -0.38 0.703

*PepD-3 ** ln *A* -0.10 -0.20 0.838 0.45 0.45 0.657

Adjusted *R2* 0.35 0.42

*F* 14.99 7.27

*n* 130 44

*PepD-4* (0.06)

All populations Isolated

populations

Coeff t P Coeff t P

Constant -0.33 -0.81 0.421 -0.74 -1.17 0.248

ln *N95* -0.21 -2.27 0.025 -0.13 -0.86 0.393

*Ntrend* 0.43 8.22 <0.001 0.39 5.24 <0.001

*PepD-4* -1.53 -0.37 0.712 -5.35 -0.59 0.557

ln *A* 0.02 0.43 0.668 0.05 0.65 0.517

*PepD-4 ** ln *A* 0.17 0.33 0.745 0.64 0.56 0.581

Adjusted *R2* 0.35 0.42

*F* 14.87 7.35

*n* 130 44

*Ak-2* (0.14)

All populations Isolated

populations

Coeff t P Coeff t P

Constant -0.39 -0.89 0.374 -1.03 -1.49 0.143

ln *N95* -0.21 -2.36 0.020 -0.15 -1.07 0.292

*Ntrend* 0.43 8.21 <0.001 0.39 5.38 <0.001

*Ak-2*  0.23 0.09 0.927 2.02 0.56 0.576

ln *A* 0.03 0.45 0.652 0.08 1.03 0.311

*Ak-2 ** ln *A* 0.01 0.03 0.976 -0.21 -0.43 0.666

Adjusted *R2* 0.35 0.44

*F* 15.23 7.78

*n* 131 45

*Ak-3* (0.84)

All populations Isolated

populations

Coeff t P Coeff t P

Constant 0.45 0.24 0.813 2.07 0.65 0.517

ln *N95* -0.21 -2.35 0.020 -0.16 -1.13 0.267

*Ntrend* 0.43 8.24 <0.001 0.39 5.34 <0.001

*Ak-3*  -0.96 -0.44 0.657 -3.22 -0.92 0.361

ln *A* -0.06 -0.23 0.817 -0.27 -0.64 0.524

*Ak-3 ** ln *A* 0.10 0.35 0.726 0.37 0.79 0.434

Adjusted *R2* 0.35 0.44

*F* 15.23 7.99

*n* 131 45

*Got-2* (0.85)

All populations Isolated

populations

Coeff t P Coeff t P

Constant -0.69 -0.49 0.625 -1.99 -1.01 0.320

ln *N95* -0.20 -2.27 0.025 -0.15 -1.02 0.313

*Ntrend* 0.44 8.43 <0.001 0.38 5.16 <0.001

*Got-2*  0.41 0.26 0.799 1.51 0.65 0.521

ln *A* 0.02 0.11 0.911 0.22 0.77 0.449

*Got-2 ** ln *A* 0.01 0.01 0.996 -0.20 -0.59 0.556

Adjusted *R2* 0.36 0.43

*F* 15.79 7.67

*n* 131 45

*Got-3* (0.15)

All populations Isolated

populations

Coeff t P Coeff t P

Constant -0.32 -0.76 0.446 -0.48 -0.61 0.545

ln *N95* -0.20 -2.27 0.025 -0.15 -1.02 0.313

*Ntrend* 0.44 8.37 <0.001 0.38 5.22 <0.001

*Got-3*  -0.21 -0.13 0.894 -1.61 -0.69 0.491

ln *A* 0.03 0.51 0.614 0.02 0.22 0.828

*Got-3 ** ln *A* -0.02 -0.09 0.925 0.21 0.65 0.520

Adjusted *R2* 0.36 0.43

*F* 15.63 7.69

*n* 131 45

*CINX22-2* (0.38)

All populations Isolated

populations

Coeff t P Coeff t P

Constant -1.25 -2.17 0.032 -1.14 -1.32 0.195

ln *N95* -0.21 -2.31 0.023 -0.12 -0.89 0.380

*Ntrend* 0.44 8.58 <0.001 0.41 5.82 <0.001

*CINX22-2* 2.80 1.99 0.048 1.53 0.80 0.428

ln *A* 0.14 1.81 0.072 0.07 0.57 0.575

*CINX22-2**ln *A* -0.36 -1.90 0.060 -0.12 -0.46 0.651

Adjusted *R2* 0.39 0.49

*F* 17.26 8.97

*n* 128 43

*CINX22-4* (0.45)

All populations Isolated

populations

Coeff t P Coeff t P

Constant 0.34 0.47 0.642 -0.00 -0.00 0.998

ln *N95* -0.21 -2.33 0.022 -0.18 -1.29 0.206

*Ntrend* 0.43 8.26 <0.001 0.41 5.87 <0.001

*CINX22-4* -1.55 -1.12 0.265 -1.59 -0.71 0.480

ln *A* -0.06 -0.67 0.503 0.01 0.05 0.959

*CINX22-4**ln *A* 0.20 1.08 0.282 0.11 0.36 0.719

Adjusted *R2* 0.38 0.50

*F* 16.35 9.28

*n* 128 43

*CINX38-1* (0.12)

All populations Isolated

populations

Coeff t P Coeff t P

Constant -0.42 -0.92 0.360 -1.30 -1.89 0.067

ln *N95* -0.21 -2.32 0.022 -0.10 -0.69 0.493

*Ntrend* 0.43 8.51 <0.001 0.38 5.48 <0.001

*CINX38-1* 0.11 0.04 0.966 4.40 1.04 0.305

ln *A* 0.04 0.80 0.424 0.12 1.57 0.126

*CINX38-1**ln *A* -0.10 -0.32 0.752 -0.71 -1.23 0.228

Adjusted *R2* 0.38 0.48

*F* 16.61 8.67

*n* 128 43

*CINX38-11* (0.48)

All populations Isolated

populations

Coeff t P Coeff t P

Constant -0.99 -1.11 0.269 -1.16 -1.03 0.310

ln *N95* -0.21 -2.32 0.022 -0.16 -1.05 0.300

*Ntrend* 0.44 8.43 <0.001 0.38 5.43 <0.001

*CINX38-11* 1.38 0.77 0.442 1.12 0.46 0.650

ln *A* 0.10 0.89 0.375 0.09 0.60 0.553

*CINX38-11**ln *A* -0.17 -0.72 0.470 -0.11 -0.35 0.731

Adjusted *R2* 0.37 0.45

*F* 16.14 7.93

*n* 128 43
